# Supplementary material for: Mortality after the Hospitalization of a Spouse
Source: Atypon-hosted journal article supplement (doi:10.1056/nejmsa050196), 2006-02-15
Supplement: nejm_christakis_719sa1.pdf [file nejm_christakis_719sa1.pdf]

## Supplementary Appendix

This appendix has been provided by the authors to give readers additional information about their work.

Supplement to: Christakis NA, Allison PD. Mortality after the hospitalization of a spouse. *N Engl J Med* 2006;354:719-30.

Web Only Appendix Table: Odds Ratios for Death Within Six Months, Conditional on New Spousal Hospitalization, by Spousal Diagnosis

| Disease category                      | Association (Odds Ratio) of wife's diagnosis with husband's risk of death within six months | 95% CI        | Association (Odds Ratio) of husband's diagnosis with wife's risk of death within six months | 95% CI        |
|---------------------------------------|---------------------------------------------------------------------------------------------|---------------|---------------------------------------------------------------------------------------------|---------------|
| Lung Cancer                           | 0.96                                                                                        | (0.74 - 1.25) | 1.27                                                                                        | (0.99 - 1.62) |
| Colon Cancer                          | 1.15                                                                                        | (0.97 - 1.37) | 0.97                                                                                        | (0.78 - 1.22) |
| Pancreas Cancer                       | 1.31                                                                                        | (0.82 - 2.10) | 1.66                                                                                        | (0.94 - 2.94) |
| Leukemia or Lymphoma                  | 1.61                                                                                        | (1.23 - 2.09) | 1.10                                                                                        | (0.77 - 1.58) |
| All Other Malignancies                | 1.03                                                                                        | (0.93 - 1.14) | 1.06                                                                                        | (0.93 - 1.21) |
| Abdominal Surgical Disease            | 1.12                                                                                        | (1.04 - 1.21) | 1.19                                                                                        | (1.08 - 1.32) |
| Pneumonia                             | 1.33                                                                                        | (1.21 - 1.45) | 1.23                                                                                        | (1.12 - 1.35) |
| Sepsis                                | 1.20                                                                                        | (1.01 - 1.43) | 1.14                                                                                        | (0.92 - 1.41) |
| Ischemic Heart Disease                | 1.12                                                                                        | (1.04 - 1.20) | 1.13                                                                                        | (1.05 - 1.23) |
| Stroke                                | 1.11                                                                                        | (1.02 - 1.19) | 1.10                                                                                        | (1.01 - 1.21) |
| Congestive Heart Failure              | 1.11                                                                                        | (1.00 - 1.22) | 1.27                                                                                        | (1.14 - 1.42) |
| Chronic Obstructive Pulmonary Disease | 1.21                                                                                        | (1.06 - 1.38) | 1.36                                                                                        | (1.17 - 1.59) |
| Hip and Serious Fractures             | 1.35                                                                                        | (1.25 - 1.46) | 1.18                                                                                        | (1.03 - 1.35) |
| Psychiatric Disease                   | 1.58                                                                                        | (1.36 - 1.85) | 1.77                                                                                        | (1.39 - 2.26) |
| Dementia                              | 1.47                                                                                        | (1.22 - 1.78) | 1.38                                                                                        | (1.11 - 1.73) |
| All Other Diagnoses                   | 1.14                                                                                        | (1.11 - 1.18) | 1.18                                                                                        | (1.13 - 1.23) |

This table gives the relative odds (in the form of odds ratios and 95% confidence intervals) of a person dying on any particular day within six months after a spouse's hospitalization, according to spousal diagnosis. These estimates are generated by case-time-control models implemented separately for husbands and wives, in the full sample of 518,240 couples.

Hospitalization for stroke, heart attack, pneumonia, or hip fracture in a woman increases a husband's odds of death, net of all stable measured or unmeasured attributes of both partners, between 10% and 35%. Hospitalization with diseases such as dementia or psychiatric conditions increases the odds of a husband's death by 47% and 58% respectively. The diagnosis of most cancers in a wife does not affect her husband's risk of death within six months. Similarly, hospitalization for stroke, heart attack, pneumonia, or hip fracture in a man increases a wife's odds of death within six months between 10 and 23%. Hospitalization with diseases such as dementia or psychiatric conditions increases the odds of a wife's death by 38% and 77% respectively. The diagnosis of cancer in a husband does not appear to affect his wife's risk of death.
